# Supplementary material
Source: PubMed Central journal article supplement (PMC5730497)

Figure 1e

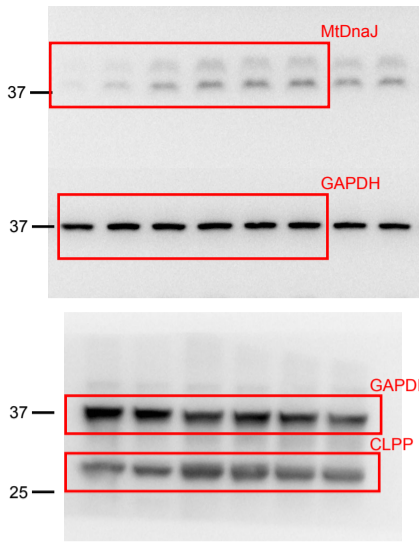

Figure 1g

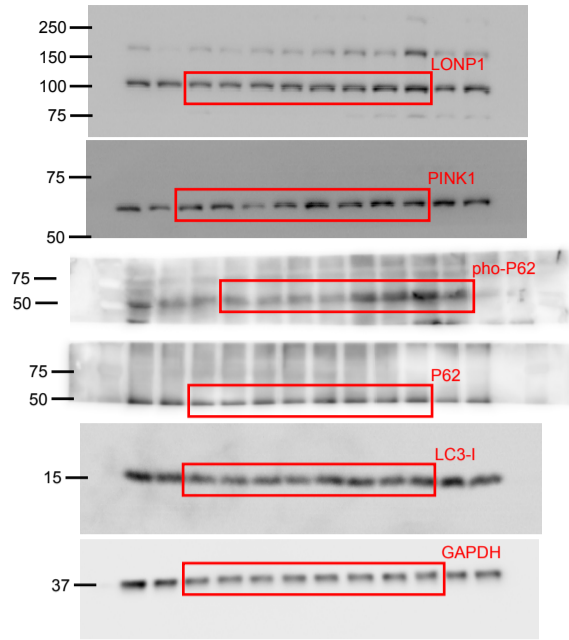

Figure 1h

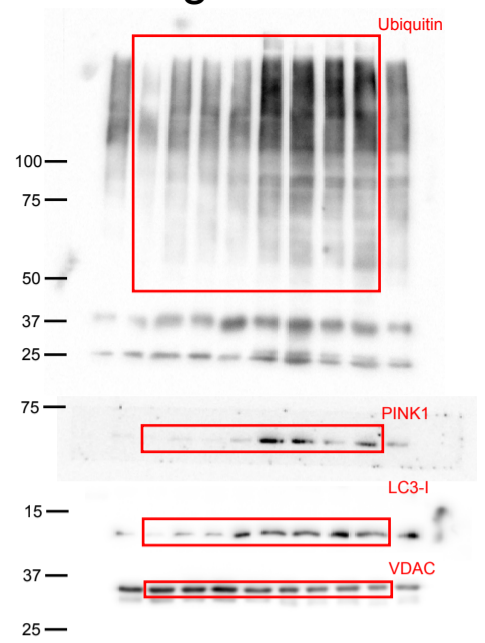

Figure 2c

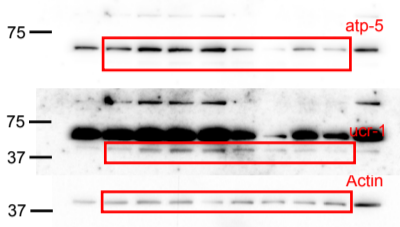

Figure 2j

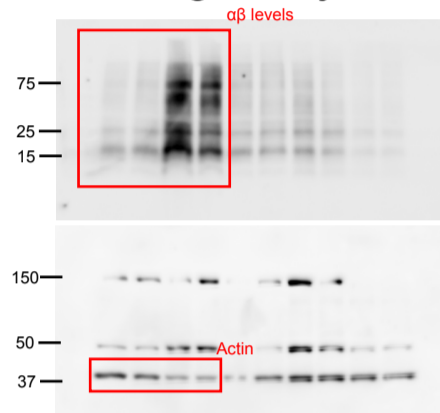

Figure 3f

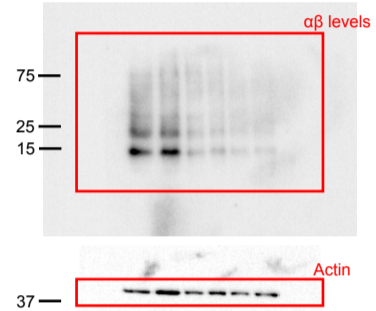

Figure 3h

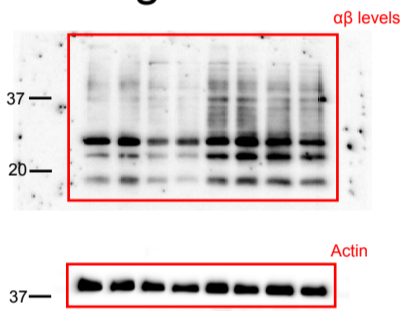

Figure 3j

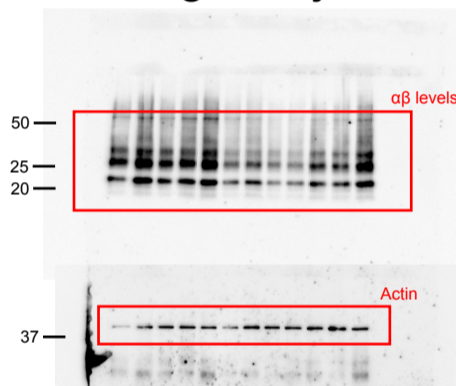

Figure 4f

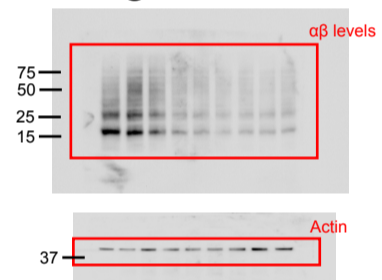

Figure 4i

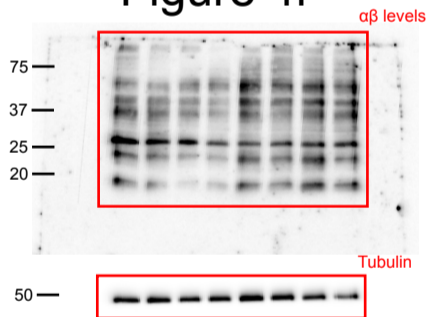

Figure 4l

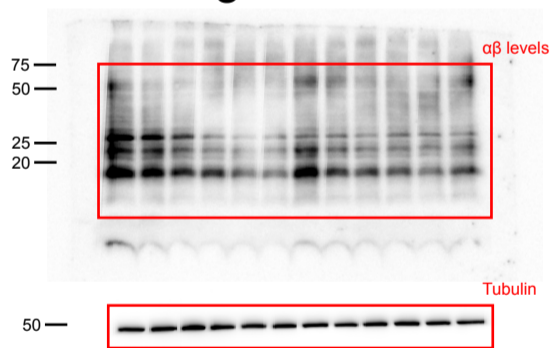

Figure 5c

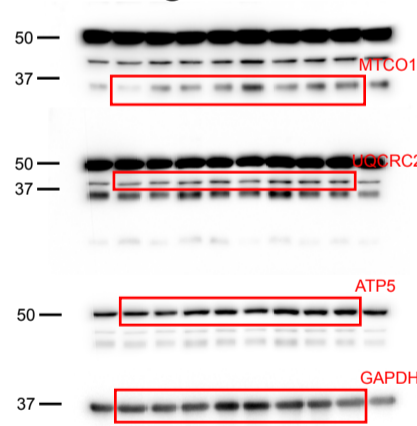

Extended data Figure 2c

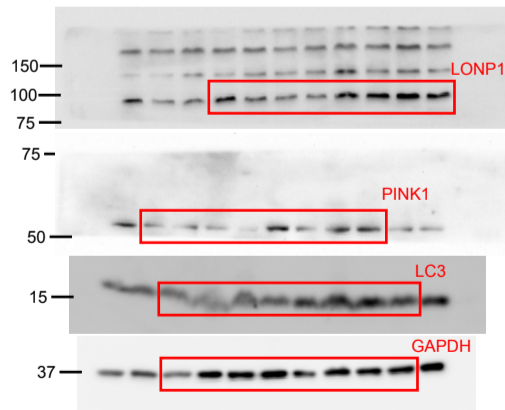

Extended data Figure 3a

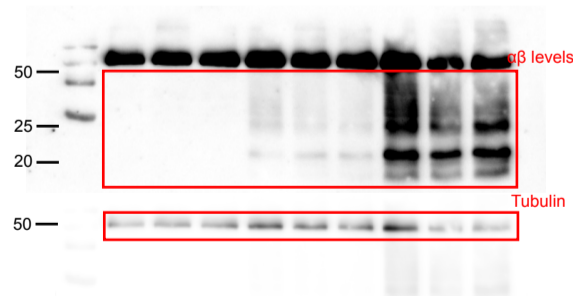

Extended data Figure 3k

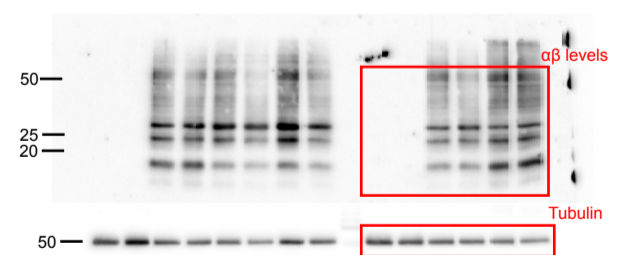

Extended data Figure 5e

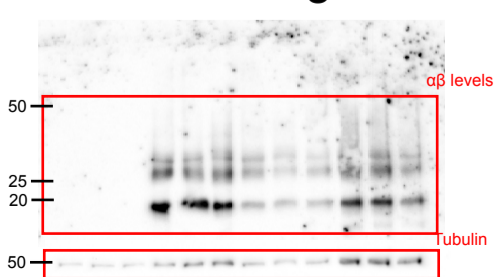

Extended data Figure 5h

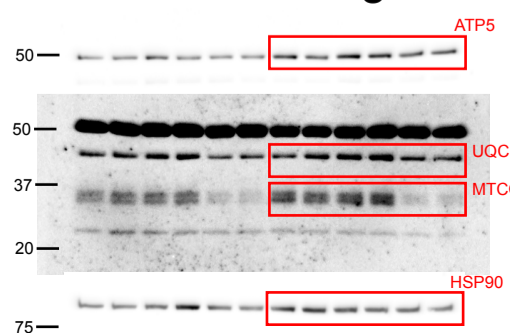

Supplement: NIHMS921329-supplement-2.pdf [file NIHMS921329-supplement-2.pdf]
