# Supplementary material
Source: PubMed Central journal article supplement (PMC5730497)
Supplement: NIHMS921329-supplement-1.pdf [file NIHMS921329-supplement-1.pdf]

## Supplementary information

### Enhancing mitochondrial proteostasis reduces amyloid- $\beta$ proteotoxicity

Vincenzo Sorrentino<sup>1</sup>, Mario Romani<sup>1\*</sup>, Laurent Mouchiroud<sup>1\*</sup>, John S. Beck<sup>2</sup>, Hongbo Zhang<sup>1</sup>, Davide D'Amico<sup>1</sup>, Norman Moullan<sup>1</sup>, Francesca Potenza<sup>1</sup>, Adrien W. Schmid<sup>3</sup>, Solène Rietsch<sup>1</sup>, Scott E. Counts<sup>2</sup>, Johan Auwerx<sup>1</sup>

*<sup>1</sup>Laboratory for Integrative and Systems Physiology, Ecole Polytechnique Fédérale de Lausanne, CH-1015 Lausanne, Switzerland; <sup>2</sup>Department of Translational Science and Molecular Medicine, Department of Family Medicine, Michigan State University, Grand Rapids, MI 49503, USA; <sup>3</sup>Proteomics Core Facility, Ecole Polytechnique Fédérale de Lausanne, CH-1015 Lausanne, Switzerland*

Correspondence to Johan Auwerx at [admin.auwerx@epfl.ch](mailto:admin.auwerx@epfl.ch)

\*, These authors contributed equally to this work

**Supplementary Table 1. GSEA (Prefrontal cortex, Hallmark Gene Set, GN327-328)**

| Enrichment    | Gene set                                   | Size       | ES           | NES          | NOM p-val    | FDR q-val    | FWER p-val   | Rank at max |
|---------------|--------------------------------------------|------------|--------------|--------------|--------------|--------------|--------------|-------------|
| Upregulated   | HALLMARK_P53_PATHWAY                       | 188        | 0.46         | 1.77         | 0.011        | 0.209        | 0.084        | 5989        |
| Upregulated   | HALLMARK_INTERFERON_GAMMA_RESPONSE         | 191        | 0.59         | 1.73         | 0.034        | 0.147        | 0.115        | 4260        |
| Upregulated   | HALLMARK_IL6_JAK_STAT3_SIGNALING           | 87         | 0.61         | 1.72         | 0.022        | 0.108        | 0.125        | 4534        |
| Upregulated   | HALLMARK_INFLAMMATORY_RESPONSE             | 194        | 0.53         | 1.70         | 0.037        | 0.101        | 0.148        | 7297        |
| Upregulated   | HALLMARK_IL2_STAT5_SIGNALING               | 184        | 0.46         | 1.69         | 0.023        | 0.085        | 0.158        | 6692        |
| Upregulated   | HALLMARK_COMPLEMENT                        | 197        | 0.46         | 1.66         | 0.047        | 0.091        | 0.200        | 5503        |
| Upregulated   | HALLMARK_COAGULATION                       | 138        | 0.47         | 1.65         | 0.026        | 0.087        | 0.209        | 8601        |
| Upregulated   | HALLMARK_HYPOXIA                           | 194        | 0.44         | 1.63         | 0.040        | 0.090        | 0.240        | 6455        |
| Upregulated   | HALLMARK_INTERFERON_ALPHA_RESPONSE         | 92         | 0.62         | 1.63         | 0.076        | 0.082        | 0.244        | 4556        |
| Upregulated   | HALLMARK_WNT_BETA_CATENIN_SIGNALING        | 41         | 0.45         | 1.54         | 0.043        | 0.136        | 0.371        | 5292        |
| Upregulated   | HALLMARK_EPITHELIAL_MESENCHYMAL_TRANSITION | 196        | 0.49         | 1.54         | 0.084        | 0.126        | 0.377        | 9219        |
| Upregulated   | HALLMARK_ALLOGRAFT_REJECTION               | 197        | 0.43         | 1.53         | 0.072        | 0.120        | 0.388        | 4251        |
| Upregulated   | HALLMARK_TNFA_SIGNALING_VIA_NFKB           | 192        | 0.51         | 1.53         | 0.097        | 0.110        | 0.388        | 6307        |
| Upregulated   | HALLMARK_ESTROGEN_RESPONSE_EARLY           | 188        | 0.37         | 1.52         | 0.037        | 0.107        | 0.393        | 5160        |
| Upregulated   | HALLMARK_TGF_BETA_SIGNALING                | 52         | 0.50         | 1.51         | 0.081        | 0.104        | 0.405        | 7212        |
| Upregulated   | HALLMARK_NOTCH_SIGNALING                   | 31         | 0.45         | 1.50         | 0.061        | 0.104        | 0.420        | 4966        |
| Upregulated   | HALLMARK_APICAL_SURFACE                    | 43         | 0.41         | 1.50         | 0.043        | 0.101        | 0.424        | 3227        |
| Upregulated   | HALLMARK_APOPTOSIS                         | 159        | 0.41         | 1.48         | 0.104        | 0.106        | 0.456        | 4291        |
| Upregulated   | HALLMARK_ESTROGEN_RESPONSE_LATE            | 196        | 0.34         | 1.42         | 0.077        | 0.145        | 0.565        | 6455        |
| Upregulated   | HALLMARK_MYOGENESIS                        | 196        | 0.36         | 1.41         | 0.090        | 0.147        | 0.588        | 7436        |
| Downregulated | <b>HALLMARK_OXIDATIVE_PHOSPHORYLATION</b>  | <b>196</b> | <b>-0.65</b> | <b>-1.82</b> | <b>0.008</b> | <b>0.058</b> | <b>0.076</b> | <b>5220</b> |
| Downregulated | HALLMARK_SPERMATOGENESIS                   | 126        | -0.42        | -1.71        | 0.006        | 0.089        | 0.170        | 7846        |
| Downregulated | HALLMARK_MYC_TARGETS_V1                    | 185        | -0.48        | -1.45        | 0.140        | 0.342        | 0.515        | 5995        |
| Downregulated | HALLMARK_PANCREAS_BETA_CELLS               | 40         | -0.38        | -1.38        | 0.091        | 0.359        | 0.605        | 2754        |
| Downregulated | HALLMARK_FATTY_ACID_METABOLISM             | 152        | -0.34        | -1.29        | 0.149        | 0.421        | 0.716        | 5372        |
| Downregulated | HALLMARK_PROTEIN_SECRETION                 | 94         | -0.39        | -1.26        | 0.252        | 0.401        | 0.752        | 6166        |
| Downregulated | HALLMARK_DNA_REPAIR                        | 142        | -0.30        | -1.17        | 0.262        | 0.478        | 0.839        | 6972        |
| Downregulated | HALLMARK_MYC_TARGETS_V2                    | 51         | -0.38        | -1.17        | 0.287        | 0.423        | 0.841        | 7167        |
| Downregulated | HALLMARK_MTORC1_SIGNALING                  | 193        | -0.33        | -1.16        | 0.284        | 0.387        | 0.846        | 5953        |
| Downregulated | HALLMARK_REACTIVE_OXIGEN_SPECIES_PATHWAY   | 45         | -0.33        | -1.08        | 0.347        | 0.457        | 0.911        | 5220        |
| Downregulated | HALLMARK_PI3K_AKT_MTOR_SIGNALING           | 96         | -0.26        | -1.04        | 0.387        | 0.470        | 0.933        | 4105        |
| Downregulated | HALLMARK_UNFOLDED_PROTEIN_RESPONSE         | 108        | -0.28        | -1.01        | 0.419        | 0.466        | 0.944        | 5055        |
| Downregulated | HALLMARK_E2F_TARGETS                       | 181        | -0.28        | -0.88        | 0.567        | 0.604        | 0.977        | 5119        |
| Downregulated | HALLMARK_HEDGEHOG_SIGNALING                | 36         | -0.26        | -0.86        | 0.633        | 0.592        | 0.982        | 5382        |
| Downregulated | HALLMARK_G2M_CHECKPOINT                    | 187        | -0.21        | -0.73        | 0.749        | 0.751        | 0.995        | 5309        |

**Supplementary Table 2. GSEA (Prefrontal cortex, Reactome Gene Set, GN327-328)**

| Enrichment    | Gene set                                                                                                                  | Size      | ES           | NES          | NOM p-val    | FDR q-val    | FWER p-val   | Rank at max |
|---------------|---------------------------------------------------------------------------------------------------------------------------|-----------|--------------|--------------|--------------|--------------|--------------|-------------|
| Upregulated   | REACTOME_AMINO_ACID_TRANSPORT_ACROSS_THE_PLASMA_MEMBRANE                                                                  | 30        | 0.61         | 1.77         | 0.004        | 1.000        | 0.443        | 3744        |
| Upregulated   | REACTOME_INTEGRIN_CELL_SURFACE_INTERACTIONS                                                                               | 77        | 0.62         | 1.77         | 0.010        | 0.642        | 0.452        | 7259        |
| Upregulated   | REACTOME_SIGNALING_BY_ILS                                                                                                 | 101       | 0.48         | 1.75         | 0.027        | 0.554        | 0.523        | 5726        |
| Upregulated   | REACTOME_ANTIGEN_ACTIVATES_B_CELL_RECEPTOR_LEADING_TO_GENERATION_OF_SECOND_MESSENGERS                                     | 29        | 0.57         | 1.74         | 0.024        | 0.436        | 0.542        | 4955        |
| Upregulated   | REACTOME_INNATE_IMMUNE_SYSTEM                                                                                             | 236       | 0.44         | 1.73         | 0.016        | 0.392        | 0.569        | 6330        |
| Upregulated   | REACTOME_CELL_SURFACE_INTERACTIONS_AT_THE_VASCULAR_WALL                                                                   | 85        | 0.53         | 1.72         | 0.028        | 0.349        | 0.584        | 7059        |
| Upregulated   | REACTOME_INTEGRIN_ALPHAIIIB_BETA3_SIGNALING                                                                               | 26        | 0.57         | 1.72         | 0.010        | 0.303        | 0.585        | 4885        |
| Upregulated   | REACTOME_COMPLEMENT_CASCADE                                                                                               | 29        | 0.70         | 1.72         | 0.020        | 0.276        | 0.598        | 5627        |
| Upregulated   | REACTOME_YAP1_AND_WWTR1_TAZ_STIMULATED_GENE_EXPRESSION                                                                    | 23        | 0.65         | 1.70         | 0.008        | 0.277        | 0.636        | 4431        |
| Upregulated   | REACTOME_GPVI_MEDIATED_ACTIVATION_CASCADE                                                                                 | 30        | 0.57         | 1.68         | 0.033        | 0.303        | 0.689        | 5503        |
| Upregulated   | REACTOME_PRE_NOTCH_TRANSCRIPTION_AND_TRANSLATION                                                                          | 24        | 0.59         | 1.67         | 0.020        | 0.310        | 0.717        | 5992        |
| Upregulated   | REACTOME_TRAF6_MEDIATED_IRF7_ACTIVATION                                                                                   | 28        | 0.53         | 1.64         | 0.017        | 0.370        | 0.781        | 8204        |
| Upregulated   | REACTOME_TOLL_RECEPTOR_CASCADES                                                                                           | 106       | 0.44         | 1.64         | 0.051        | 0.347        | 0.784        | 6330        |
| Upregulated   | REACTOME_TRAF6_MEDIATED_NFKB_ACTIVATION                                                                                   | 20        | 0.64         | 1.63         | 0.021        | 0.342        | 0.795        | 9459        |
| Upregulated   | REACTOME_RNA_POL_I_PROMOTER_OPENING                                                                                       | 56        | 0.60         | 1.62         | 0.049        | 0.332        | 0.805        | 10207       |
| Upregulated   | REACTOME_CHONDROITIN_SULFATE_DERMATAN_SULFATE_METABOLISM                                                                  | 39        | 0.54         | 1.62         | 0.032        | 0.312        | 0.807        | 4760        |
| Upregulated   | REACTOME_SMAD2_SMAD3_SMAD4_HETEROTRIMER_REGULATES_TRANSCRIPTION                                                           | 25        | 0.57         | 1.61         | 0.053        | 0.337        | 0.832        | 6301        |
| Upregulated   | REACTOME_GROWTH_HORMONE_RECEPTOR_SIGNALING                                                                                | 23        | 0.57         | 1.60         | 0.037        | 0.326        | 0.837        | 10693       |
| Upregulated   | REACTOME_RIP_MEDIATED_NFKB_ACTIVATION_VIA_DAI                                                                             | 17        | 0.64         | 1.60         | 0.023        | 0.314        | 0.840        | 9459        |
| Upregulated   | REACTOME_ACTIVATED_TLR4_SIGNALLING                                                                                        | 84        | 0.41         | 1.60         | 0.041        | 0.306        | 0.846        | 6330        |
| Downregulated | <b>REACTOME_MITOCHONDRIAL_PROTEIN_IMPORT</b>                                                                              | <b>47</b> | <b>-0.68</b> | <b>-1.92</b> | <b>0.002</b> | <b>0.295</b> | <b>0.147</b> | <b>4436</b> |
| Downregulated | REACTOME_TCA_CYCLE_AND_RESPIRATORY_ELECTRON_TRANSPORT                                                                     | 113       | -0.68        | -1.79        | 0.008        | 0.686        | 0.389        | 6319        |
| Downregulated | REACTOME_NEUROTRANSMITTER_RELEASE_CYCLE                                                                                   | 34        | -0.61        | -1.77        | 0.004        | 0.580        | 0.451        | 4429        |
| Downregulated | REACTOME_ION_CHANNEL_TRANSPORT                                                                                            | 54        | -0.54        | -1.77        | 0.008        | 0.439        | 0.452        | 5726        |
| Downregulated | REACTOME_RESPIRATORY_ELECTRON_TRANSPORT                                                                                   | 62        | -0.77        | -1.76        | 0.006        | 0.360        | 0.456        | 6869        |
| Downregulated | REACTOME_RESPIRATORY_ELECTRON_TRANSPORT_ATP_SYNTHESIS_BY_CHEMIOSMOTIC_COUPLING_AND_HEAT_PRODUCTION_BY_UNCOUPLING_PROTEINS | 78        | -0.74        | -1.76        | 0.012        | 0.320        | 0.467        | 5162        |
| Downregulated | REACTOME_REGULATION_OF_INSULIN_SECRETION                                                                                  | 88        | -0.41        | -1.72        | 0.000        | 0.379        | 0.545        | 4549        |
| Downregulated | REACTOME_INSULIN_SYNTHESIS_AND_PROCESSING                                                                                 | 20        | -0.64        | -1.70        | 0.014        | 0.411        | 0.616        | 4257        |
| Downregulated | REACTOME_TRANSMISSION_ACROSS_CHEMICAL_SYNAPSES                                                                            | 182       | -0.46        | -1.68        | 0.013        | 0.424        | 0.654        | 6112        |
| Downregulated | REACTOME_INSULIN_RECEPTOR_RECYCLING                                                                                       | 23        | -0.55        | -1.68        | 0.028        | 0.382        | 0.654        | 4528        |
| Downregulated | REACTOME_LIGAND_GATED_ION_CHANNEL_TRANSPORT                                                                               | 21        | -0.73        | -1.68        | 0.012        | 0.348        | 0.655        | 6498        |
| Downregulated | REACTOME_RNA_POL_III_TRANSCRIPTION_TERMINATION                                                                            | 19        | -0.65        | -1.68        | 0.013        | 0.322        | 0.658        | 5095        |
| Downregulated | REACTOME_GLYCONEOGENESIS                                                                                                  | 31        | -0.56        | -1.68        | 0.039        | 0.302        | 0.664        | 4436        |
| Downregulated | REACTOME_RNA_POL_III_TRANSCRIPTION_INITIATION_FROM_TYPE_3_PROMOTER                                                        | 25        | -0.58        | -1.68        | 0.013        | 0.285        | 0.666        | 5095        |
| Downregulated | REACTOME_CA_DEPENDENT_EVENTS                                                                                              | 29        | -0.56        | -1.68        | 0.010        | 0.270        | 0.668        | 4790        |
| Downregulated | REACTOME_AMINE_LIGAND_BINDING_RECEPTORS                                                                                   | 36        | -0.55        | -1.67        | 0.014        | 0.264        | 0.677        | 5009        |
| Downregulated | REACTOME_GABA_SYNTHESIS_RELEASE_REUPTAKE_AND_DEGRADATION                                                                  | 17        | -0.76        | -1.67        | 0.008        | 0.252        | 0.683        | 4429        |

|               |                                           |     |       |       |       |       |       |      |
|---------------|-------------------------------------------|-----|-------|-------|-------|-------|-------|------|
| Downregulated | REACTOME_GABA_RECEPTOR_ACTIVATION         | 51  | -0.48 | -1.67 | 0.021 | 0.242 | 0.685 | 4629 |
| Downregulated | REACTOME_RNA_POL_III_TRANSCRIPTION        | 31  | -0.54 | -1.67 | 0.016 | 0.231 | 0.688 | 5095 |
| Downregulated | REACTOME_INTEGRATION_OF_ENERGY_METABOLISM | 114 | -0.38 | -1.67 | 0.000 | 0.220 | 0.689 | 4183 |

**Supplementary Table 3. List of Human genes used for GSEA (Oxidative Phosphorylation, GN327-328)**

| Gene Name | Rank in gene list | Running ES   | Core enrichment |
|-----------|-------------------|--------------|-----------------|
| TCIRG1    | 238               | 9.47E-04     | No              |
| ATP6V0E1  | 273               | 0.007746442  | No              |
| CASP7     | 305               | 0.014505365  | No              |
| BDH2      | 564               | 0.014140344  | No              |
| SLC25A20  | 624               | 0.019433038  | No              |
| ACADVL    | 748               | 0.022662003  | No              |
| ABCB7     | 758               | 0.02919176   | No              |
| BAX       | 1507              | 0.013326788  | No              |
| CPT1A     | 2268              | -0.003545472 | No              |
| HADHA     | 2534              | -0.00624248  | No              |
| PDK4      | 2802              | -0.009186301 | No              |
| ACAA1     | 2943              | -0.008525506 | No              |
| HADHB     | 2992              | -0.005222628 | No              |
| ALDH6A1   | 3746              | -0.022787208 | No              |
| OGDH      | 3954              | -0.024606545 | No              |
| CYB5R3    | 4443              | -0.034821402 | No              |
| null      | 4768              | -0.04042752  | No              |
| SUPV3L1   | 5004              | -0.04355653  | No              |
| POLR2F    | 5638              | -0.058490362 | No              |
| ACAA2     | 5707              | -0.057049196 | No              |
| ECH1      | 5873              | -0.058487084 | No              |
| DLST      | 6272              | -0.06683774  | No              |
| MAOB      | 7349              | -0.09524228  | No              |
| ATP5D     | 7980              | -0.11088957  | No              |
| POR       | 8123              | -0.112415165 | No              |
| RHOT1     | 9204              | -0.14148025  | No              |
| ATP6V0B   | 9283              | -0.14148046  | No              |
| MTRR      | 9593              | -0.14826742  | No              |
| CYB5A     | 9681              | -0.14863075  | No              |
| FXN       | 10122             | -0.15936103  | No              |
| IDH1      | 10745             | -0.17552482  | No              |
| ETFDH     | 13614             | -0.25755665  | No              |
| MTRF1     | 13924             | -0.26537377  | No              |
| ATP5G2    | 14482             | -0.28051037  | No              |
| GLUD1     | 17371             | -0.36396435  | No              |
| DECR1     | 17493             | -0.3671173   | No              |
| SURF1     | 17679             | -0.3721663   | No              |
| ECHS1     | 17956             | -0.3799227   | No              |
| NDUFS8    | 18012             | -0.38127485  | No              |
| PMPCA     | 18297             | -0.38934627  | No              |
| ACAT1     | 18573             | -0.39721522  | No              |
| IDH3G     | 19139             | -0.4135997   | No              |

|          |       |             |     |
|----------|-------|-------------|-----|
| SDHC     | 19375 | -0.42035037 | No  |
| NDUFS1   | 20241 | -0.4451744  | No  |
| RHOT2    | 20701 | -0.45810148 | No  |
| MRPS15   | 21063 | -0.46809044 | No  |
| SDHA     | 21092 | -0.46840557 | No  |
| NDUFA2   | 23108 | -0.5258305  | No  |
| MRPL34   | 24546 | -0.5660229  | No  |
| COX17    | 24722 | -0.5695249  | No  |
| ETFB     | 24792 | -0.5699227  | No  |
| ATP5I    | 25170 | -0.5791359  | No  |
| IDH2     | 25279 | -0.58050066 | No  |
| ETFA     | 25492 | -0.5848     | No  |
| ACADM    | 25582 | -0.5854947  | No  |
| BCKDHA   | 25744 | -0.5882201  | No  |
| SLC25A11 | 25891 | -0.59046113 | No  |
| UQCRB    | 26392 | -0.6027919  | No  |
| RETSAT   | 26417 | -0.60129106 | No  |
| ATP5E    | 26472 | -0.600633   | No  |
| COX11    | 27478 | -0.62713176 | No  |
| NDUFS7   | 27775 | -0.63291025 | No  |
| NDUFS4   | 28009 | -0.6367495  | No  |
| MRPS12   | 28236 | -0.6402649  | No  |
| NDUFA3   | 28325 | -0.6397288  | No  |
| SUCLG1   | 28333 | -0.63683784 | No  |
| TIMM9    | 28347 | -0.63411564 | No  |
| NDUFC1   | 28382 | -0.63198406 | No  |
| FDX1     | 28687 | -0.63753635 | No  |
| COX6A1   | 28868 | -0.6393904  | No  |
| CS       | 29250 | -0.6468447  | No  |
| GPX4     | 29424 | -0.648152   | Yes |
| SDHD     | 29482 | -0.6460534  | Yes |
| UQCRC2   | 29629 | -0.646455   | Yes |
| OXA1L    | 29690 | -0.64432424 | Yes |
| NDUFA1   | 29751 | -0.6421554  | Yes |
| PRDX3    | 29882 | -0.6419338  | Yes |
| NDUFB4   | 29902 | -0.63847554 | Yes |
| HTRA2    | 29967 | -0.63629013 | Yes |
| LDHA     | 29982 | -0.63264626 | Yes |
| ATP6V0C  | 30116 | -0.6323709  | Yes |
| LDHB     | 30140 | -0.6288906  | Yes |
| SLC25A12 | 30208 | -0.626635   | Yes |
| COX7C    | 30235 | -0.6231672  | Yes |
| MRPL11   | 30279 | -0.62016    | Yes |
| ACO2     | 30333 | -0.617402   | Yes |
| null     | 30358 | -0.6137867  | Yes |
| NDUFB7   | 30513 | -0.6138337  | Yes |
| GRPEL1   | 30653 | -0.6133473  | Yes |
| IDH3B    | 30742 | -0.6113163  | Yes |

|          |       |             |     |
|----------|-------|-------------|-----|
| VDAC1    | 30870 | -0.61032826 | Yes |
| COX8A    | 30985 | -0.6088688  | Yes |
| ATP5J2   | 30991 | -0.6042391  | Yes |
| COX5B    | 31298 | -0.6081189  | Yes |
| ATP6V1C1 | 31322 | -0.6037657  | Yes |
| MRPL35   | 31339 | -0.59919184 | Yes |
| BRP44L   | 31343 | -0.5942391  | Yes |
| NDUFB8   | 31454 | -0.5923202  | Yes |
| PHYH     | 31604 | -0.5914238  | Yes |
| SUCLA2   | 31649 | -0.5874463  | Yes |
| COX7A2L  | 31698 | -0.58355296 | Yes |
| NQO2     | 31899 | -0.58390963 | Yes |
| SLC25A6  | 31958 | -0.58008903 | Yes |
| TIMM13   | 31987 | -0.5753724  | Yes |
| IDH3A    | 32186 | -0.5754219  | Yes |
| ATP5O    | 32240 | -0.5712174  | Yes |
| NDUFB3   | 32292 | -0.56691796 | Yes |
| ALAS1    | 32305 | -0.56147695 | Yes |
| TIMM10   | 32339 | -0.5566143  | Yes |
| COX6B1   | 32379 | -0.55188733 | Yes |
| NDUFB1   | 32395 | -0.54645103 | Yes |
| null     | 32425 | -0.5413895  | Yes |
| NDUFB2   | 32426 | -0.5354847  | Yes |
| PHB2     | 32434 | -0.52977943 | Yes |
| ACADSB   | 32435 | -0.52387094 | Yes |
| NNT      | 32455 | -0.51849234 | Yes |
| NDUFS2   | 32456 | -0.5125621  | Yes |
| ATP6V1G1 | 32542 | -0.50899106 | Yes |
| NDUFV2   | 32558 | -0.50337034 | Yes |
| DLD      | 32690 | -0.50101745 | Yes |
| COX5A    | 32723 | -0.49576384 | Yes |
| COX15    | 32755 | -0.4904478  | Yes |
| COX10    | 32831 | -0.48634717 | Yes |
| VDAC3    | 32879 | -0.48138762 | Yes |
| UQCRC1   | 32903 | -0.47570786 | Yes |
| ATP5F1   | 32906 | -0.46941715 | Yes |
| HCCS     | 32973 | -0.46491614 | Yes |
| null     | 33020 | -0.45978478 | Yes |
| SDHB     | 33023 | -0.4533721  | Yes |
| COX7B    | 33040 | -0.44735762 | Yes |
| TIMM50   | 33064 | -0.44151887 | Yes |
| NDUFV1   | 33147 | -0.43730906 | Yes |
| MRPS11   | 33190 | -0.43189594 | Yes |
| FH       | 33223 | -0.4261589  | Yes |
| ATP1B1   | 33259 | -0.42047036 | Yes |
| null     | 33273 | -0.4141297  | Yes |
| COX6C    | 33317 | -0.40861037 | Yes |
| GPI      | 33386 | -0.40374428 | Yes |

|         |       |              |     |
|---------|-------|--------------|-----|
| TIMM8B  | 33405 | -0.39740607  | Yes |
| ATP6AP1 | 33435 | -0.3913562   | Yes |
| TIMM17A | 33445 | -0.38471472  | Yes |
| PDHA1   | 33450 | -0.37792483  | Yes |
| MDH1    | 33473 | -0.37162995  | Yes |
| MFN2    | 33474 | -0.3646952   | Yes |
| MTX2    | 33489 | -0.35815784  | Yes |
| PDHX    | 33495 | -0.35135248  | Yes |
| OAT     | 33503 | -0.34459558  | Yes |
| NDUFA8  | 33534 | -0.33846205  | Yes |
| TOMM22  | 33583 | -0.33279976  | Yes |
| MRPS22  | 33595 | -0.32605374  | Yes |
| UQCRFS1 | 33658 | -0.32073495  | Yes |
| MRPS30  | 33673 | -0.31400982  | Yes |
| ATP5G3  | 33678 | -0.30698562  | Yes |
| AFG3L2  | 33703 | -0.30051062  | Yes |
| ATP6V1F | 33710 | -0.2935041   | Yes |
| ATP6V1H | 33715 | -0.28643623  | Yes |
| NDUFA9  | 33730 | -0.2796449   | Yes |
| LRPPRC  | 33744 | -0.27281663  | Yes |
| MGST3   | 33747 | -0.26566803  | Yes |
| GOT2    | 33803 | -0.25999585  | Yes |
| ATP5A1  | 33811 | -0.25291687  | Yes |
| CYC1    | 33821 | -0.24588588  | Yes |
| PDHB    | 33834 | -0.238931    | Yes |
| TOMM70A | 33847 | -0.2319581   | Yes |
| OPA1    | 33852 | -0.22474873  | Yes |
| NDUFB6  | 33922 | -0.2193208   | Yes |
| UQCRQ   | 33924 | -0.21191664  | Yes |
| DLAT    | 33933 | -0.20470312  | Yes |
| ATP6V1D | 33959 | -0.197935    | Yes |
| UQCRH   | 33968 | -0.19066676  | Yes |
| SLC25A4 | 34010 | -0.1842913   | Yes |
| NDUFAB1 | 34011 | -0.17672525  | Yes |
| NDUFS6  | 34040 | -0.16993845  | Yes |
| COX4I1  | 34068 | -0.16308294  | Yes |
| IMMT    | 34137 | -0.15728046  | Yes |
| MRPL15  | 34139 | -0.14952837  | Yes |
| NDUFA6  | 34142 | -0.14179952  | Yes |
| NDUFS3  | 34144 | -0.13403678  | Yes |
| VDAC2   | 34145 | -0.12623832  | Yes |
| NDUFA4  | 34147 | -0.118468575 | Yes |
| ATP5H   | 34163 | -0.11108551  | Yes |
| NDUFA5  | 34170 | -0.10342472  | Yes |
| ATP5B   | 34188 | -0.09604499  | Yes |
| CYCS    | 34257 | -0.09002689  | Yes |
| NDUFC2  | 34286 | -0.0827958   | Yes |
| COX7A2  | 34301 | -0.07510456  | Yes |



|          |       |              |     |
|----------|-------|--------------|-----|
| ATP5L    | 34350 | -0.06827457  | Yes |
| SLC25A5  | 34382 | -0.060870606 | Yes |
| ATP5C1   | 34389 | -0.052717168 | Yes |
| ATP5J    | 34406 | -0.04480607  | Yes |
| NDUFB5   | 34421 | -0.03679262  | Yes |
| ATP6V1E1 | 34423 | -0.028401112 | Yes |
| MDH2     | 34427 | -0.020056587 | Yes |
| NDUFA7   | 34437 | -0.011861139 | Yes |
| SLC25A3  | 34489 | -0.00463875  | Yes |
| ATP5G1   | 34564 | 0.002264278  | Yes |

**Supplementary Table 4. List of Human genes used for GSEA (Mitochondrial Protein Import, GN327-328)**

| Gene Name | Rank in gene list | Running ES   | Core enrichment |
|-----------|-------------------|--------------|-----------------|
| TAZ       | 217               | 0.030715793  | No              |
| GFER      | 3434              | -0.04142935  | No              |
| MTX1      | 5400              | -0.081726424 | No              |
| LDHD      | 5919              | -0.08110618  | No              |
| TIMM44    | 7881              | -0.12531078  | No              |
| FXN       | 10122             | -0.18051185  | No              |
| TIMM17B   | 12394             | -0.23911586  | No              |
| TOMM7     | 16254             | -0.34772995  | No              |
| HSPD1     | 16297             | -0.3460585   | No              |
| null      | 16983             | -0.3636731   | No              |
| PMPCA     | 18297             | -0.40081638  | No              |
| IDH3G     | 19139             | -0.42504367  | No              |
| TIMM22    | 19267             | -0.42849085  | No              |
| PMPCB     | 22167             | -0.50860226  | No              |
| SLC25A13  | 24512             | -0.5692842   | No              |
| COX17     | 24722             | -0.5679506   | No              |
| TIMM9     | 28347             | -0.6582189   | No              |
| COQ2      | 28724             | -0.65370923  | No              |
| CS        | 29250             | -0.65203345  | No              |
| SLC25A12  | 30208             | -0.6600675   | Yes             |
| TOMM40    | 30233             | -0.64104134  | Yes             |
| ACO2      | 30333             | -0.62382615  | Yes             |
| CHCHD4    | 30345             | -0.604037    | Yes             |
| null      | 30358             | -0.5842345   | Yes             |
| BCS1L     | 30361             | -0.56413794  | Yes             |
| GRPEL1    | 30653             | -0.5514207   | Yes             |
| VDAC1     | 30870             | -0.5358195   | Yes             |
| FXC1      | 31867             | -0.53925127  | Yes             |
| GRPEL2    | 31904             | -0.51481646  | Yes             |
| SLC25A6   | 31958             | -0.49062788  | Yes             |
| TIMM13    | 31987             | -0.46559948  | Yes             |
| TIMM10    | 32339             | -0.4485465   | Yes             |
| SAMM50    | 32644             | -0.4287354   | Yes             |
| TIMM50    | 33064             | -0.41044345  | Yes             |
| TIMM8B    | 33405             | -0.38821244  | Yes             |
| TIMM17A   | 33445             | -0.3570848   | Yes             |
| MTX2      | 33489             | -0.3258811   | Yes             |
| TOMM22    | 33583             | -0.2955995   | Yes             |
| ATP5A1    | 33811             | -0.26813293  | Yes             |
| CYC1      | 33821             | -0.23431808  | Yes             |
| TOMM70A   | 33847             | -0.20083024  | Yes             |
| SLC25A4   | 34010             | -0.17016007  | Yes             |
| DNAJC19   | 34064             | -0.1360141   | Yes             |

|        |       |              |     |
|--------|-------|--------------|-----|
| TOMM20 | 34149 | -0.10197448  | Yes |
| ATP5B  | 34188 | -0.06628301  | Yes |
| TIMM8A | 34221 | -0.030154238 | Yes |
| ATP5G1 | 34564 | 0.002254659  | Yes |

**Supplementary Table 5. List of Human genes used for the gene expression correlation**

| Gene Name      | Gene ID | Description                                                     | PCA                  |
|----------------|---------|-----------------------------------------------------------------|----------------------|
| <i>BECN1</i>   | 8678    | beclin 1                                                        | Mitochondrial Stress |
| <i>BNIP3</i>   | 664     | BCL2 interacting protein 3                                      | Mitochondrial Stress |
| <i>CLPP</i>    | 8192    | caseinolytic mitochondrial matrix peptidase proteolytic subunit | Mitochondrial Stress |
| <i>COX5A</i>   |         |                                                                 | Mitochondrial Stress |
| <i>CYC1</i>    |         |                                                                 | Mitochondrial Stress |
| <i>DNM1L</i>   |         |                                                                 | Mitochondrial Stress |
| <i>HSPA9</i>   | 3313    | heat shock protein family A (Hsp70) member 9                    | Mitochondrial Stress |
| <i>HTRA2</i>   | 27429   | HtrA serine peptidase 2                                         | Mitochondrial Stress |
| <i>LONP1</i>   | 9361    | lon peptidase 1, mitochondrial                                  | Mitochondrial Stress |
| <i>PARK2</i>   | 5071    | parkin RBR E3 ubiquitin protein ligase                          | Mitochondrial Stress |
| <i>PMPCB</i>   | 9512    | peptidase, mitochondrial processing beta subunit                | Mitochondrial Stress |
| <i>TIMM17A</i> | 10440   | translocase of inner mitochondrial membrane 17 homolog A        | Mitochondrial Stress |
| <i>YME1L1</i>  |         |                                                                 | Mitochondrial Stress |
| <i>ATF6</i>    | 22926   | activating transcription factor 6                               | UPR <sup>ER</sup>    |
| <i>EIF2A</i>   | 83939   | eukaryotic translation initiation factor 2A                     | UPR <sup>ER</sup>    |
| <i>ERO1LB</i>  | 56605   | endoplasmic reticulum oxidoreductase 1 beta                     | UPR <sup>ER</sup>    |
| <i>ERO1L</i>   |         |                                                                 | UPR <sup>ER</sup>    |
| <i>ERN1</i>    |         |                                                                 | UPR <sup>ER</sup>    |
| <i>ERN2</i>    |         |                                                                 | UPR <sup>ER</sup>    |
| <i>HSPA5</i>   | 3309    | heat shock protein family A (Hsp70) member 5                    | UPR <sup>ER</sup>    |
| <i>TRAF2</i>   | 7186    | TNF receptor associated factor 2                                | UPR <sup>ER</sup>    |
| <i>XBP1</i>    | 7494    | X-box binding protein 1                                         | UPR <sup>ER</sup>    |
| <i>CLPB</i>    | 81570   | ClpB homolog, mitochondrial AAA ATPase chaperonin               | HSR                  |
| <i>DNAJA1</i>  | 3301    | DnaJ heat shock protein family (Hsp40) member A1                | HSR                  |
| <i>DNAJB1</i>  | 3337    | DnaJ heat shock protein family (Hsp40) member B1                | HSR                  |
| <i>DNAJC1</i>  | 64215   | DnaJ heat shock protein family (Hsp40) member c1                | HSR                  |
| <i>HSP90</i>   | 3320    | heat shock protein 90 alpha family class A member 1             | HSR                  |
| <i>HSPA14</i>  | 51182   | heat shock protein family A (Hsp70) member 14                   | HSR                  |
| <i>HSPA2</i>   | 3306    | heat shock protein family A (Hsp70) member 2                    | HSR                  |

**Supplementary Table 6. Clinical, demographic and neuropathological characteristics of cases by diagnosis group**

|                                         |                                           | Clinical Diagnosis    |                        |                         | Statistics |                      |
|-----------------------------------------|-------------------------------------------|-----------------------|------------------------|-------------------------|------------|----------------------|
|                                         |                                           | NCI<br>(n = 8)        | MCI<br>(n = 8)         | AD<br>(n = 8)           | p-value    | Pair-wise comparison |
| Age (years) at death                    | mean ± SD (range)                         | 89.2 ± 2.6 (84-92)    | 88.4 ± 3.9 (82-91)     | 88.9 ± 2.8 (85-92)      | 0.1        | --                   |
| Number (%) of males                     |                                           | 4 (50%)               | 4 (50%)                | 3 (38%)                 | 0.9        | --                   |
| Years of education                      | mean ± SD (range)                         | 18.3 ± 2.7 (15-22)    | 18.7 ± 5.3 (9-23)      | 17.4 ± 3.6 (13-22)      | 0.1        | --                   |
| Number (%) with ApoE ε4 allele          |                                           | 2 (25%)               | 2 (25%)                | 4 (50%)                 | 0.01       | AD>(NCI,MCI)         |
| MMSE                                    | mean ± SD (range)                         | 27.5 ± 1.7 (25-30)    | 25.5 ± 3.0 (21-29)     | 19.7 ± 4.8 (10-26)      | 0.0008     | (NCI,MCI)>AD         |
| Global cognitive score                  | mean ± SD (range)                         | 0.08 ± 0.3 (-0.2-0.5) | -0.34 ± 0.4 (-1.0-0.4) | -1.2 ± 0.5 (-1.8- -0.4) | 0.0006     | (NCI,MCI)>AD         |
| Post-mortem interval (hours)            | mean ± SD (range)                         | 7.1 ± 3.9 (4.4-12.0)  | 5.0 ± 3.3 (3.2-8.0)    | 6.8 ± 3.8 (4.2-14.0)    | 0.4        | --                   |
| Distribution of Braak scores            | 0<br>I/II<br>III/IV<br>V/VI               | 0<br>5<br>3<br>0      | 0<br>0<br>8<br>0       | 0<br>0<br>3<br>5        | 0.0005     | (MCI,AD)>NCI         |
| NIA Reagan diagnosis (likelihood of AD) | No AD<br>Low<br>Intermediate<br>High      | 0<br>7<br>1<br>0      | 0<br>2<br>6<br>0       | 0<br>2<br>4<br>2        | 0.0008     | (MCI,AD)>NCI         |
| CERAD diagnosis                         | No AD<br>Possible<br>Probable<br>Definite | 1<br>5<br>2<br>0      | 0<br>3<br>5<br>0       | 0<br>2<br>5<br>1        | 0.001      | (MCI,AD)>NCI         |

<sup>a</sup>Kruskal-Wallis test, with Bonferroni correction for multiple comparisons. <sup>b</sup>Fisher's exact test, with Bonferroni correction for multiple comparisons.

Abbreviations: NCI, No Cognitive Impairment; MCI, mild cognitive impairment; AD, Alzheimer's disease; MMSE, Mini-Mental State Exam; NIA, National Institute on Aging; CERAD, Consortium to Establish a Registry for Alzheimer's Disease

**Supplementary Table 7. List of qPCR primers used in *C. elegans***

| Gene Symbol         | Gene ID | Forward                    | Reverse                    |
|---------------------|---------|----------------------------|----------------------------|
| <i>act-1</i>        | 179535  | CTACGAACTTCCTGACGGACAAG    | CCGGCGGACTCCATAACC         |
| <i>pmp-3</i>        | 179968  | GTTCCCGTGTTCACTCAT         | ACACCGTCGAGAAGCTGTAGA      |
| <i>hsp-6</i>        | 178873  | AGAGCCAAGTTCGAGCAGAT       | TCTTGAACAGTGGCTTGCAC       |
| <i>hsp-60</i>       | 175316  | GGAAGCCCAAAGATCACAAA       | CAGCCTCCTCATTAGCCTTG       |
| <i>ymel-1</i>       | 176460  | CAAAACCTGATCTCGCTGGG       | TTCTCAATGTCGGCTCCAGT       |
| <i>clpp-1</i>       | 174594  | TGATAAGTGCAACAGTGCCA       | TGATTCTGGAGTTCGGGAGA       |
| <i>lonp-1</i>       | 172966  | CGATGATGGCCATTGTGCAG       | CGCTTTGAAACATCAATTTTCATCCA |
| <i>sqst-1</i>       | 178139  | GATCCTCCGACCACTCCAAA       | TGGAAGTGGTGAACGATCA        |
| <i>dct-1</i>        | 181053  | GCAAAAGCCGTCTCAAACCC       | ACCCACGATTCTGACATACCA      |
| <i>pdr-1</i>        | 176816  | AGCCACCGAGCGATTGATTGC      | GTGGCATTGTTGGGCATCTTCTTG   |
| <i>pink-1</i>       | 173918  | AAGCACCAGAAATTGCGACG       | ACGAGATGGGAGTGCTGGTA       |
| <i>cco-1</i>        | 172832  | GCTCGTCTTGCTGGAGATGATCGTT  | GGTCGGCGTCGACTCCCTTG       |
| <i>mev-1</i>        | 260040  | ATCGATCGTCACCAAGTCCG       | GGAATCCGGAGAGCATCCAG       |
| <i>cyc-1</i>        | 172582  | GTGCCGTGGTTCAAGGAT         | TTCACGTCGTACAGAAGC         |
| <i>nduo-1</i>       | 2565698 | AGCGTCATTTATTGGGAAGAAGAC   | AAGCTTGCTAATCCATAAATGT     |
| <i>hsp-3</i>        | 180880  | CCATCAGCTCGGAAAGTTCG       | TTCCGGTTCCTTATCCTCG        |
| <i>hsp-4</i>        | 174203  | GACATCGAGCGCATGATCAA       | CCTTGTCGGCGATTTGAGTT       |
| <i>hsp-16.1</i>     | 179286  | ACCACTATTTCCGTCCAGCT       | ATCTTCTGGCTTGAACCTGCG      |
| <i>hsp-16.2</i>     | 178659  | TCCATCTGAGTCTTCTGAGATTGTTA | TGGTTTAAACTGTGAGACGTTGA    |
| <i>hsp-16.41</i>    | 178660  | TGCTCCGTTCTCCATATTCTGA     | AGAGACATCGAGTTGAACCGA      |
| <i>hsp-16.48/49</i> | 179287  | CTCATGCTCCGTTCTCCATT       | ACAATCTCTCCAATATTGTCCGA    |
| <i>sod-3</i>        | 181748  | TCTGACATCACTATTGCGGTTT     | TTTCTTGCAATATCCCAACCAT     |
| <i>hsp-12.6</i>     | 177778  | AGGGAGATGGAGTTGTCAATG      | TTCAATCTCTTTGGGAGGAAG      |
| <i>atfs-1 3'UTR</i> | 179922  | TCCCTTTGTTACCCAACTGT       | TGGGATCGAATACCCGTAACAA     |
| <i>atfs-1</i>       | 179922  | TCCTAGATTGGGAAAATCAACTG    | TACCATTCTGCCATGAGTCG       |

**Supplementary Table 8. List of primers used in *M. musculus***

| Gene Symbol   | Gene ID | Forward                    | Reverse                 |
|---------------|---------|----------------------------|-------------------------|
| <i>Gapdh</i>  | 14433   | TGTGTCCGTCGTGGATCTGA       | CCTGCTTCACCACCTTCTTGAT  |
| <i>B2m</i>    | 12010   | ATGGGAAGCCGAACATACTG       | CAGTCTCAGTGGGGTGAAT     |
| <i>Hspa9</i>  | 15526   | AATGAGAGCGCTCCTTGCTG       | CTGTTCCCCAGTGCCAGAAC    |
| <i>Hsp60</i>  | 15510   | GCTGTAGCTGTTACAATGGGG      | TGACTTTGCAACAGTGACCC    |
| <i>Yme1l1</i> | 27377   | AGGGACCTTGGATTATCTGAACT    | TGGGATGTATGCCAATGGGAA   |
| <i>Clpp</i>   | 53895   | TGTTGCGGGAACGCATCGTGT      | TAGATGGCCAGGCCCGCAGTT   |
| <i>Lonp1</i>  | 74142   | ATGACCGTCCCGGATGTGT        | CCTCCACGATCTTGATAAAGCG  |
| <i>Bnip3</i>  | 12176   | CCTGTGCGAGTTGGGTTC         | GAAGTGCAGTTCTACCCAGGAG  |
| <i>Sqstm1</i> | 18412   | GCTGAAGGAAGCTGCCCTAT       | TTGGTCTGTAGGAGCCTGGT    |
| <i>Park2</i>  | 50873   | CCGAATCACCTGACGGTTCA       | TCTGGCTGCTTCTGAATCCC    |
| <i>Cox5a</i>  | 12858   | GAGCCCAAATCATTGATGC        | TGAGGTCCTGCTTTGTCCTT    |
| <i>Cox2</i>   | 17709   | AACCGAGTCGTTCTGCCAAT       | CTAGGGAGGGGACTGCTCAT    |
| <i>Nd1</i>    | 17716   | CAAACACTTATTACAACCCAAGAACA | TCATATTATGGCTATGGGTCAGG |
| <i>Sdhc</i>   | 66052   | GCTGCGTTCTTGCTGAGACA       | ATCTCCTCCTTAGCTGTGGTT   |
| <i>Pink1</i>  | 68943   | GCTTGCCAATCCCTTCTATG       | CTCTCGCTGGAGCAGTGAC     |
| <i>Lc3</i>    | 66734   | GTCACCCAGGCGAGTTACC        | TTACAGCGGTGCGGCGAAG     |
| <i>hApp</i>   | 351     | GGTTGGCACTGCTCCTG          | CAGTCTGCCACAGAACATGG    |

**Supplementary Table 9. List of primers used in human neuroblastoma cells**

| Gene Symbol   | Gene ID | Forward                 | Reverse               |
|---------------|---------|-------------------------|-----------------------|
| <i>GAPDH</i>  | 2597    | TTGGTATCGTGGAAGGACTC    | ACAGTCTTCTGGGTGGCAGT  |
| <i>HSPA9</i>  | 3313    | TGGTGAGCGACTTGTTGGAAT   | ATTGGAGGCACGGACAATTTT |
| <i>HSP60</i>  | 3329    | GGGTAACCGAAGCATTCTGC    | CTGCACTCTGTCCCTCACTC  |
| <i>YME1L1</i> | 10730   | AGGGACCTTGGATTATCTGAACT | TGGGATGTATGCCAATGGGAA |
| <i>CLPP</i>   | 8192    | AAGCACACCAACAGAGCCT     | AAGATGCCAAACTCCTGGG   |
| <i>LONP1</i>  | 9361    | CCCGCGCTTTATCAAGATT     | AGAAAGACGCCGACATAAGG  |
| <i>BNIP3</i>  | 664     | AGGGCTCCTGGGTAGAACTG    | CCCTGTTGGTATCTTGTGGTG |
| <i>COX5A</i>  | 9377    | CATTGATGCTGCTTTCGGGG    | AGCCCATCCATGCGGTTTAC  |
| <i>ND1</i>    | 6775098 | CCGAATCACCTGACGGTTCA    | TCTGGCTGCTTCTGAATCCC  |

**Supplementary Table 10. List of primers used in *H. sapiens***

| Gene Symbol   | Gene ID | Taqman Probe set |
|---------------|---------|------------------|
| <i>GAPDH</i>  | 2597    | Hs02758991_g1    |
| <i>HSPA9</i>  | 3313    | Hs00269818_m1    |
| <i>HSPD1</i>  | 3329    | Hs01941522_u1    |
| <i>YME1L1</i> | 10730   | Hs00204609_m1    |
| <i>DNM1L</i>  | 10059   | Hs01552605_m1    |
| <i>BECN1</i>  | 8678    | Hs00186838_m1    |
| <i>SQSTM1</i> | 8878    | Hs01061917_g1    |

|              |      |               |
|--------------|------|---------------|
| <i>PARK2</i> | 5071 | Hs01038322_m1 |
| <i>COX5A</i> | 9377 | Hs00362067_m1 |
| <i>CYC1</i>  | 1537 | Hs00357718_g1 |

**Supplementary Table 11. List of antibodies**

| Antibody                     | Supplier                     | Reference #     | Validation   | Species            |
|------------------------------|------------------------------|-----------------|--------------|--------------------|
| HSP60                        | Enzo Life Science            | ADI-SPA-806     | manufacturer | Mouse              |
| CLPP                         | Sigma                        | WH0008192M1     | manufacturer | Mouse              |
| GAPDH (14C10)                | Cell Signaling               | 2118S           | manufacturer | Mouse              |
| LONP1                        | Sigma                        | HPA002192       | manufacturer | Mouse              |
| PINK1                        | Novus Biologicals            | BC100-494       | manufacturer | Mouse              |
| LC3 A/B                      | Cell Signaling               | 4108S           | manufacturer | Mouse              |
| SDHB                         | Abcam                        | ab110413        | manufacturer | Mouse              |
| MTCO1                        | Abcam                        | ab14705         | manufacturer | Mouse              |
| SQSTM1                       | BD Transduction Laboratories | 610497          | manufacturer | Mouse              |
| Phospho SQSTM1               | Cell signaling               | 95967           | manufacturer | Mouse              |
| VDAC                         | Abcam                        | ab14734         | manufacturer | Mouse              |
| Ubiquitin                    | Enzo Life Science            | BML-PW8810-0100 | manufacturer | Mouse              |
| $\beta$ -amyloid,1-16 (6E10) | BioLegend                    | 803002          | manufacturer | Mouse, Human       |
| $\beta$ -amyloid,17-24 (4G8) | BioLegend                    | 800701          | manufacturer | Mouse, Human       |
| anti-Oligomer (A11)          | Thermo Scientific            | AHB0052         | manufacturer | Mouse, Human       |
| CLPP (2E1D9)                 | ProteinTech                  | 66271-1-Ig      | manufacturer | Human              |
| GAPDH (2D9)                  | Origene                      | TA802519        | manufacturer | Human              |
| mtDnaJ (RS13)                | Cell Signaling               | 4775S           | manufacturer | Human              |
| Anti-Beta-Amyloid 1-42       | Millipore                    | AB5078P         | manufacturer | Human              |
| Actin                        | Sigma                        | A5441           | manufacturer | Human, mouse, worm |
| Tubulin                      | Santa Cruz                   | Sc-5286         | manufacturer | Human, mouse, worm |

**Supplementary Table 12. List of *C. elegans* strains**

| Strain | Supplier                  | Genotype information                                                             | Notes                |
|--------|---------------------------|----------------------------------------------------------------------------------|----------------------|
| N2     | CGC                       | <i>C. elegans</i> Bristol wild isolate                                           |                      |
| CL2122 | CGC                       | dvls15 [( <i>pPD30.38</i> ) <i>unc-54</i> + ( <i>pCL26</i> ) <i>mtl-2::GFP</i> ] | Backcrossed 3x in N2 |
| GMC101 | CGC                       | dvls100 [ <i>unc-54p::A-beta-1-42::unc-54</i> 3'-UTR + <i>mtl-2p::GFP</i> ]      |                      |
| CB4876 | CGC                       | <i>clk-1(e2519)</i> III                                                          |                      |
| MQ1333 | CGC                       | <i>nuo-6(qm200)</i> I                                                            |                      |
| AUW9   | Generated <i>in house</i> | [ <i>GMC101</i> + epfEx6[ <i>atfs-1p::atfs-1</i> ]]                              | Clone 1              |
| AUW10  | Generated <i>in house</i> | [ <i>GMC101</i> + epfEx7[ <i>atfs-1p::atfs-1</i> ]]                              | Clone 2              |
| AUW11  | Generated <i>in house</i> | [ <i>CL2122</i> + epfEx8[ <i>atfs-1p::atfs-1</i> ]]                              |                      |



|       |                           |                                    |  |
|-------|---------------------------|------------------------------------|--|
| AUW12 | Generated <i>in house</i> | [GMC101 + <i>clk-1(e2519)</i> III] |  |
| AUW13 | Generated <i>in house</i> | [GMC101 + <i>nuo-6(qm200)</i> I]   |  |

**Supplementary Table 13. List of cloning and sequencing primers used in *C. elegans***

| Gene Symbol            | Gene ID | Forward                                             | Reverse                                                     |
|------------------------|---------|-----------------------------------------------------|-------------------------------------------------------------|
| <i>atfs-1 promoter</i> | 179922  | CTAACATGTAAAAATAATAAAAGGACA<br>AAAAAGC              | GTAACCGGTTTTGATGGTACTGTTTCAGATGG                            |
| <i>atfs-1 CDS</i>      | 179922  | GTTCCCGTGTTTCATCACTCAT                              | ACACCGTCGAGAAGCTGTAGA                                       |
| <i>pPD30.38 seq</i>    |         | TTTTGTGATGCTCGTCAGGG                                | TTAGAAGTCAGAGGCACGGG                                        |
| <i>atfs-1 seq.1</i>    | 179922  | GGAAGCCCAAAGATCACAAA                                | TCTAAAGGATTGTCAACGATTTTT                                    |
| <i>atfs-1 seq.2</i>    | 179922  | CAAAACCTGATCTCGCTGGG                                | TTCAAAAATATCAGTTTCTTTT                                      |
| <i>atfs-1 seq.3</i>    | 179922  | TGATAAGTGCACCAAGTGTCCA                              | GTCAGAATGCACCATGATGTTG                                      |
| <i>clk-1</i>           | 175729  | TTCAGTGTGGCTGCTTATGC                                | AAAAGGGACACATTATTGAAATTGTT                                  |
| <i>clk-1 seq.</i>      | 175729  |                                                     | ATTATTGAAATTGTTCAAATTTTCTCAG                                |
| <i>nuo-6</i>           | 172438  | TGCGATAAAATTGGATATTAACACT                           | ATTCCGATGGTTGGAGCA                                          |
| <i>nuo-6 seq.</i>      | 172438  |                                                     | CGATGGTTGGAGCAAAGAG                                         |
| <i>atfs-1 RNAi#2</i>   | 179922  | GGGGACAAGTTTGTACAAAAAAGCAG<br>GCTTCGGCTCCCCGCTCTTCC | GGGGACCACTTTGTACAAGAAAGCTGGGTCGAG<br>TTGATTTTCTGATTGAGATGTG |

### **Human datasets for bioinformatics studies**

For the *in silico* analysis of human brain expression datasets, we have used two sets of publicly available RNA-seq data: (1) from the Harvard Brain Tissue Resource Center (HBTRC), for human primary visual cortex (GN Accession: GN327) and human prefrontal cortex (GN Accession: GN328), and (2) from the Translational Genomics Research Institute, for the whole brain (GN Accession: GN314). These two datasets are publicly available on GeneNetwork ([www.genenetwork.org](http://www.genenetwork.org)).

GN327 and GN328 are two sets of publicly available RNA-seq data generated by the Harvard Brain Tissue Resource Center (HBTRC). The 803 participants in this dataset are composed of 388 Alzheimer's disease cases and 195 controls matched for age, gender, and post mortem interval (as well as 220 Huntington's disease cases). Three brain regions including the cerebellum, the visual cortex and the dorsolateral prefrontal cortex from the same individuals were profiled on a custom-made Agilent 44K microarray. Clinical outcomes available include age at onset, age at death, Braak scores and Regional brain enlargement/atrophy. In our study, we have analyzed the visual cortex (GN237) and the prefrontal cortex (GN238).

GN314 is a set generated by Translational Genomics Research Institute. This human brain expression data was obtained from patients with Alzheimer's disease and age-matched elderly control subjects. Samples were recovered from cortical regions of 14 normal elderly

humans (10 males and 4 females) and from 33 AD cases (15 males and 18 females). 6 brain regions were analyzed with about 14 biological replicates per brain region. The brain regions are as the entorhinal, hippocampus, medial temporal gyrus, posterior cingulate, superior frontal gyrus and primary visual cortex. Mean age of cases and controls was 80 years. All samples were run on the Affymetrix U133 Plus 2.0 array.
